# Supplementary material for: A Proposed Theoretical Approach for the Estimation of Seismic Structural Vulnerability of Wastewater Treatment Plants
Source: MDPI journal article supplement (doi:10.3390/su13094835), 2021-04-25
Supplement: s1 [file s1]

# A Proposed Theoretical Approach for the Estimation of Seismic Structural Vulnerability of Wastewater Treatment Plants

Ploutarchos N. Kerpelis <sup>1,2,\*</sup>, Spyridon K. Golfinopoulos <sup>2</sup> and Dimitrios E. Alexakis <sup>1</sup>

<sup>1</sup> University of West Attica, Ancient Olive Grove Campus, 250 Thivon str., Egaleo GR-12244, Greece, kerpelis@uniwa.gr, d.alexakis@uniwa.gr

<sup>2</sup> University of Aegean, School of Engineering, Department of Financial and Management Engineering, 41 Kountourioti str., Chios GR-82132, Greece, s.golfinopoulos@fme.aegean.gr

\* Correspondence: kerpelis@uniwa.gr; Tel. +30-2105381364

**Keywords:** structural vulnerability; seismicity; Wastewater Treatment Plants; sustainability

**Table S1.** Abbreviations and definitions

|       |                                                           |
|-------|-----------------------------------------------------------|
| ASCE  | American Society of Civil Engineers                       |
| CIP   | Critical Infrastructure Protection                        |
| EPCIP | European Programme for Critical Infrastructure Protection |
| EPPO  | Earthquake Planning and Protection Organization           |
| FEMA  | Federal Emergency Management Agency                       |
| GCRC  | Greek Code for Reinforced Concrete 2000                   |
| GCSRS | Greek Code for Seismic Resistant Structures 2000          |
| GGG   | Greek Government Gazette                                  |
| HAZUS | Hazards United States                                     |
| IBC   | International Building Code                               |
| ICC   | International Code Council                                |
| IEBC  | International Existing Building Code                      |
| NDPs  | Nationally Determined Parameters                          |
| RC    | Reinforced Concrete                                       |
| SD    | Sustainability Development                                |
| SSD   | Seismic Structural Vulnerability                          |
| USGS  | United States Geological Survey                           |
| WTPs  | Wastewater Treatment Plants                               |
